# Supplementary material
Source: PubMed Central journal article supplement (PMC8748413)
Supplement: NIHMS1756226-supplement-1.pdf [file NIHMS1756226-supplement-1.pdf]

Supplementary Table 1: Group x Phase interaction for number of training sessions (0a = comparator).

| Interaction             | Wald Value | p-value  |
|-------------------------|------------|----------|
| [GRP=1.00] * [Phase=P1] | 25.182     | p<0.0001 |
| [GRP=1.00] * [Phase=P2] | 27.037     | p<0.0001 |
| [GRP=1.00] * [Phase=P3] | 26.001     | p<0.0001 |
| [GRP=1.00] * [Phase=P4] | 25.914     | p<0.0001 |
| [GRP=1.00] * [Phase=P5] | 9.6950     | 0.0020   |
| [GRP=2.00] * [Phase=P1] | 26.506     | p<0.0001 |
| [GRP=2.00] * [Phase=P2] | 18.534     | p<0.0001 |

|                         |        |          |
|-------------------------|--------|----------|
| [GRP=2.00] * [Phase=P3] | 24.351 | p<0.0001 |
| [GRP=2.00] * [Phase=P4] | 21.524 | p<0.0001 |
| [GRP=2.00] * [Phase=P5] | 0a     | .        |

Supplementary Table 2: Group x Condition interaction for number of rewards in best performance sessions (0a = comparator).

| Group x Condition Interaction | Wald Value | p-value |
|-------------------------------|------------|---------|
| [CTRL] * [Vis]                | 5.515      | 0.019   |
| [CTRL] * [Hid]                | 0.546      | 0.460   |
| [FSE] * [Vis]                 | 6.438      | 0.011   |
| [FSE] * [Hid]                 | 0a         | .       |

Supplementary Table 3: Group x Condition interaction for reward to entrance ratio in best performance sessions (0a = comparator).

| Group x Condition Interaction | Wald Value | p-value |
|-------------------------------|------------|---------|
| [CTRL] * [Vis]                | 8.271      | 0.004   |
| [CTRL] * [Hid]                | 0.907      | 0.341   |
| [FSE] * [Vis]                 | 6.384      | 0.012   |
| [FSE] * [Hid]                 | 0a         | .       |

Supplementary Table 4: Group x Condition interaction for proportion goal time (0a = comparator).

| Group x Condition Interaction | Wald Value | p-value  |
|-------------------------------|------------|----------|
| [CTRL] * [Vis]                | 7.036      | 0.0080   |
| [CTRL] * [Hid]                | 0.015      | 0.9030   |
| [FSE] * [Vis]                 | 15.408     | p<0.0001 |
| [FSE] * [Hid]                 | 0a         | .        |
